# Supplementary material for: Resting-State Connectivity of the Left Frontal Cortex to the Default Mode and Dorsal Attention Network Supports Reserve in Mild Cognitive Impairment
Source: Front Aging Neurosci. 2017 Aug 7;9:264. doi: 10.3389/fnagi.2017.00264 (PMC5545597; doi:10.3389/fnagi.2017.00264)
Supplement: Supplementary file 2 [file Table_1.XLSX]

## Sheet: Blatt1
LFC connectivity as a predictor of memory reserve (i.e. residualized memory performance)
	Sample
	TUM HC			TUM MCI			ISD HC			ISD MCI
Network	B	SE	p	B	SE	p	B	SE	p	B	SE	p
Limbic	1.08	9.14	0.91	8.07	12.15	0.513	-1.43	3.49	0.69	3.95	4.95	0.434
Fronto-parietal	-6.99	5.34	0.22	10.82	8.45	0.214	-2.15	2.7	0.43	-7.08	5.33	0.19
Ventral attention	-4.62	3.83	0.26	-1.92	6.43	0.768	0.42	2.56	0.87	2.76	3.58	0.45
Somatomotor	-0.84	3.45	0.81	-1.03	4.59	0.824	2.26	1.55	0.16	3.1	2.61	0.25
Visual	-4.15	4.18	0.34	-1.313	5.89	0.826	0.86	1.84	0.64	3.92	3.07	0.215
