# Supplementary material for: Resting-State Connectivity of the Left Frontal Cortex to the Default Mode and Dorsal Attention Network Supports Reserve in Mild Cognitive Impairment
Source: Front Aging Neurosci. 2017 Aug 7;9:264. doi: 10.3389/fnagi.2017.00264 (PMC5545597; doi:10.3389/fnagi.2017.00264)
Supplement: Supplementary file 3 [file Table_2.XLSX]

## Sheet: Blatt1
LFC connectivity as a predictor of memory reserve (i.e. residualized memory performance)
		Sample
		TUM HC			TUM MCI			ISD HC			ISD MCI
Network	7 Network Parcel	B	SE	p	B	SE	p	B	SE	p	B	SE	p
1	Visual	-1.71	5.1	0.74	-3.63	6	0.55	-2.48	3.26	0.45	4.91	5.2	0.36
2	Visual	-1.25	3.21	0.71	1.9	3.68	0.61	1.93	2.38	0.43	7.58	5.72	0.2
3	Motor	1.09	3.3	0.75	1.66	3.67	0.66	0.56	2.3	0.81	3.34	2.99	0.28
4	Motor	-0.33	3.19	0.92	2.08	4.29	0.63	4.21	2.52	0.11	4.06	4.52	0.38
5	DAN	3.23	2.74	0.27	12.16	5.46	0.0153	2.23	2.46	0.37	10.71	4.84	0.019
6	DAN	2.27	3.78	0.56	8.12	5.18	0.0325	0.84	4.6	0.86	4.87	2.77	0.046
7	VAN	1.85	3.37	0.6	8.27	5.66	0.16	0.59	4.32	0.87	6.49	4.27	0.15
8	FPAN/VAN	-3.68	5.83	0.54	16.63	22.65	0.47	-1.14	3.63	0.76	5.55	7.02	0.44
9	Limbic	-8.96	11.78	0.47	1.51	6.21	0.81	-5.98	5.73	0.3	6.63	7.51	0.39
10	Limbic	3.59	12.9	0.79	0.55	4.52	0.9	-2.66	6.14	0.67	-1.21	9.66	0.9
11	DMN	-6.6	5	0.22	-26.6	9	0.007	-2.58	3.35	0.45	-8.58	6	0.084
12	FPAN	-6.5	4.7	0.19	16.63	22.7	0.47	-6.91	7.17	0.34	3.01	4.3	0.58
13	FPAN	1.51	6.21	0.81	10.72	7.39	0.16	-2.81	4.59	0.55	-10.34	6.94	0.155
14	DMN/VAN	0.55	4.53	0.9	-0.17	13.77	0.99	1.23	4.72	0.8	-4.09	8.35	0.63
15	DMN	-5.5	4.1	0.21	-8.11	11.67	0.49	-0.34	3.83	0.93	-1.85	6.2	0.76
16	DMN	-6.75	9.57	0.5	-15.86	8.38	0.036	-3.38	2.92	0.26	-12.92	4.76	0.006
17	DMN	-8.46	6.09	0.2	-14.67	9.12	0.03	-3.03	3.37	0.38	-10.35	5.56	0.038
